# Supplementary material for: Climate change modulates the stratospheric volcanic sulfate aerosol lifecycle and radiative forcing from tropical eruptions
Source: Springer Nature journal article supplement (doi:10.1038/s41467-021-24943-7), 2021-08-12
Supplement: 41467_2021_24943_MOESM1_ESM.pdf [file 41467_2021_24943_MOESM1_ESM.pdf]

1 **Supplementary Information for “Climate change modulates the stratospheric**  
2 **volcanic sulfate aerosol lifecycle and radiative forcing from tropical eruptions”**

3 Thomas J. Aubry<sup>\*1,2</sup>, Johnny Staunton-Sykes<sup>3</sup>, Lauren R. Marshall<sup>3</sup>, Jim Haywood<sup>4,5</sup>, Nathan Luke

4 Abraham<sup>3,6</sup>, Anja Schmidt<sup>1,3</sup>

5 <sup>1</sup>Department of Geography, University of Cambridge, Cambridge, UK

6 <sup>2</sup>Sidney Sussex College, Cambridge, UK

7 <sup>3</sup>Department of Chemistry, University of Cambridge, Cambridge, UK

8 <sup>4</sup>College of Engineering Mathematics and Physical Sciences, University of Exeter, UK

9 <sup>5</sup>Met Office Hadley Centre, Exeter, UK

10 <sup>6</sup>National Centre for Atmospheric Science, UK

11 \*Correspondence and requests for materials should be addressed to T.J.A. (email:ta460@cam.ac.uk)

12

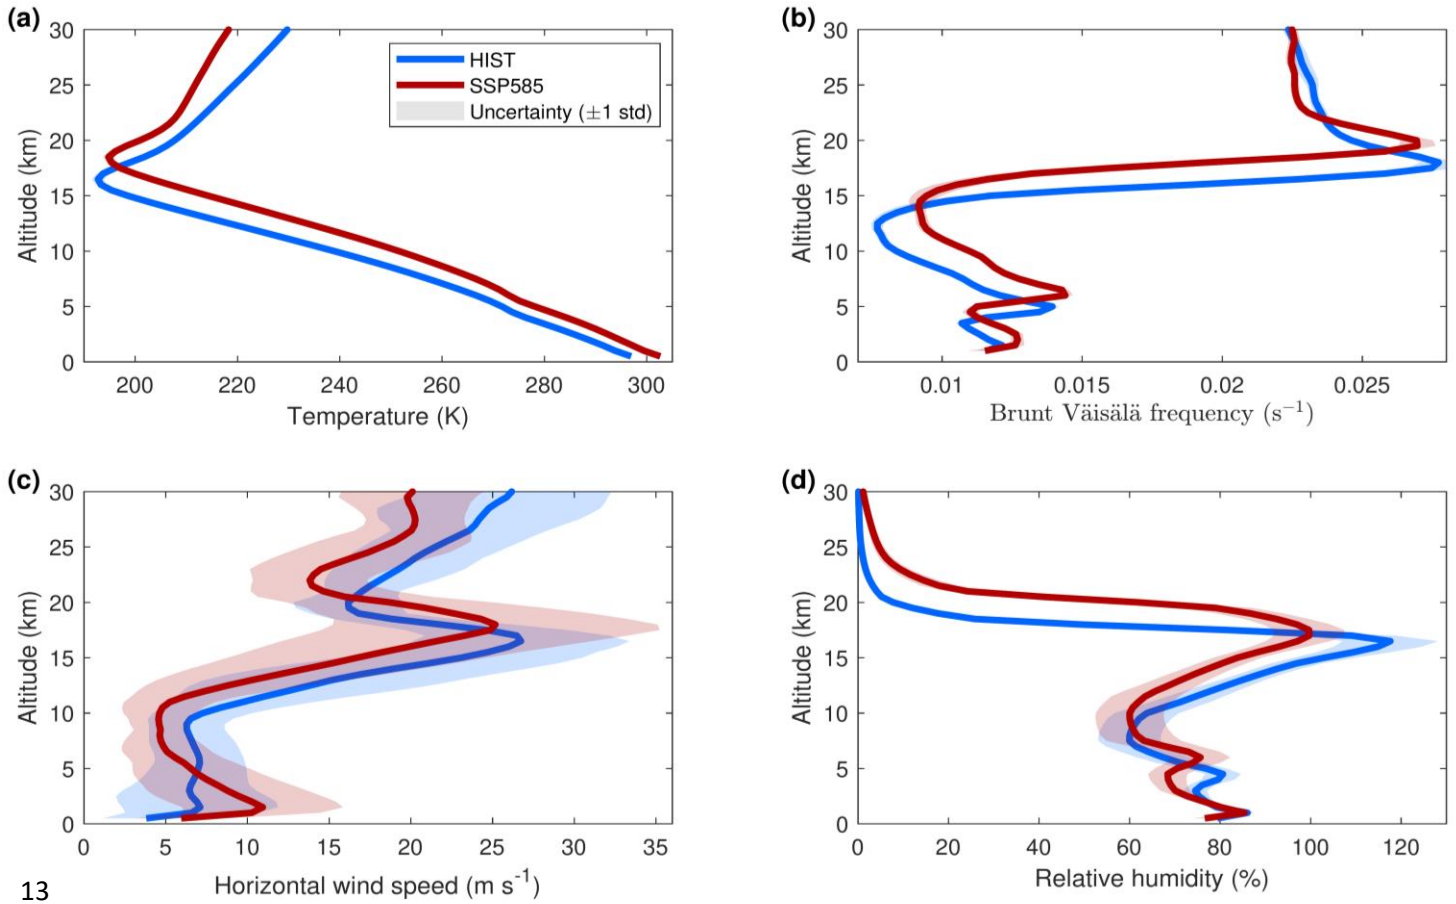

13

14 **Supplementary Figure 1:** Atmospheric conditions used as input to the eruptive column model. Profiles

15 of temperature (a), Brunt-Väisälä frequency (b), horizontal wind speed (c) and relative humidity (d)

16 simulated by UKESM1 at the location of Mt Pinatubo (15.1°N,120.4°E) on July 1<sup>st</sup> in our control runs.

17 Profiles are shown for the HIST (blue) and SSP585 (red) scenarios, and shadings show one standard

18 deviation across the 20 years of each control run.

19

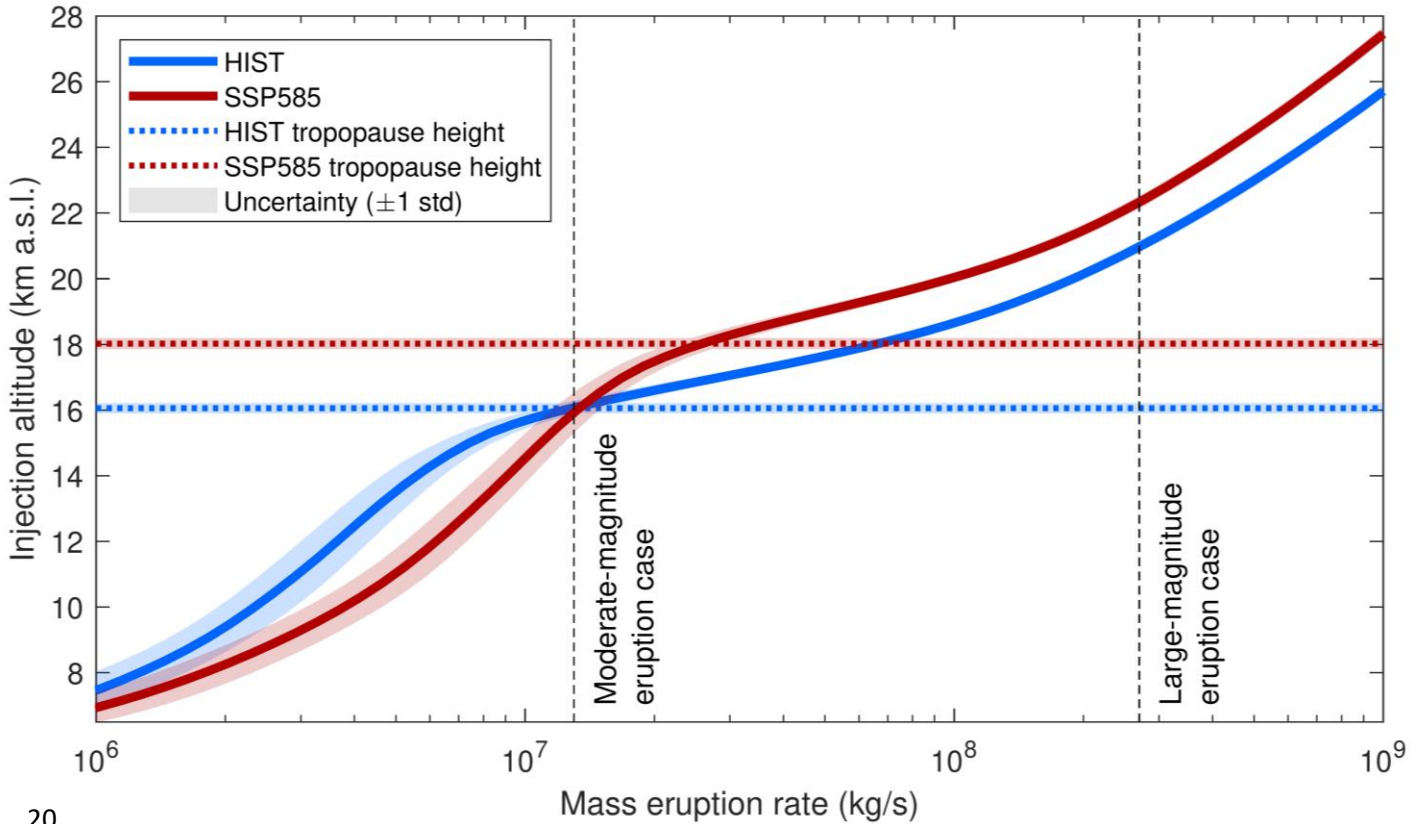

20  
 21 **Supplementary Figure 2:** Injection altitude predicted by the 1D eruptive column model used in this  
 22 study. Results are shown for mass eruption rates (also referred to as eruption intensity) between  $10^6$   
 23 and  $10^9$   $\text{kg s}^{-1}$ , and using atmospheric profiles shown in Supplementary Figure 1. Blue refer to the HIST  
 24 scenario and red refer to the SSP585 scenario, with shadings showing one standard deviation across the  
 25 20 set of atmospheric profiles. Horizontal dashed lines show the tropopause height, and black vertical  
 26 dashed line show mass eruption rates corresponding to our moderate-magnitude ( $1.3 \times 10^7$   $\text{kg s}^{-1}$ ) and  
 27 large-magnitude ( $2.7 \times 10^8$   $\text{kg s}^{-1}$ ) eruption cases.

28

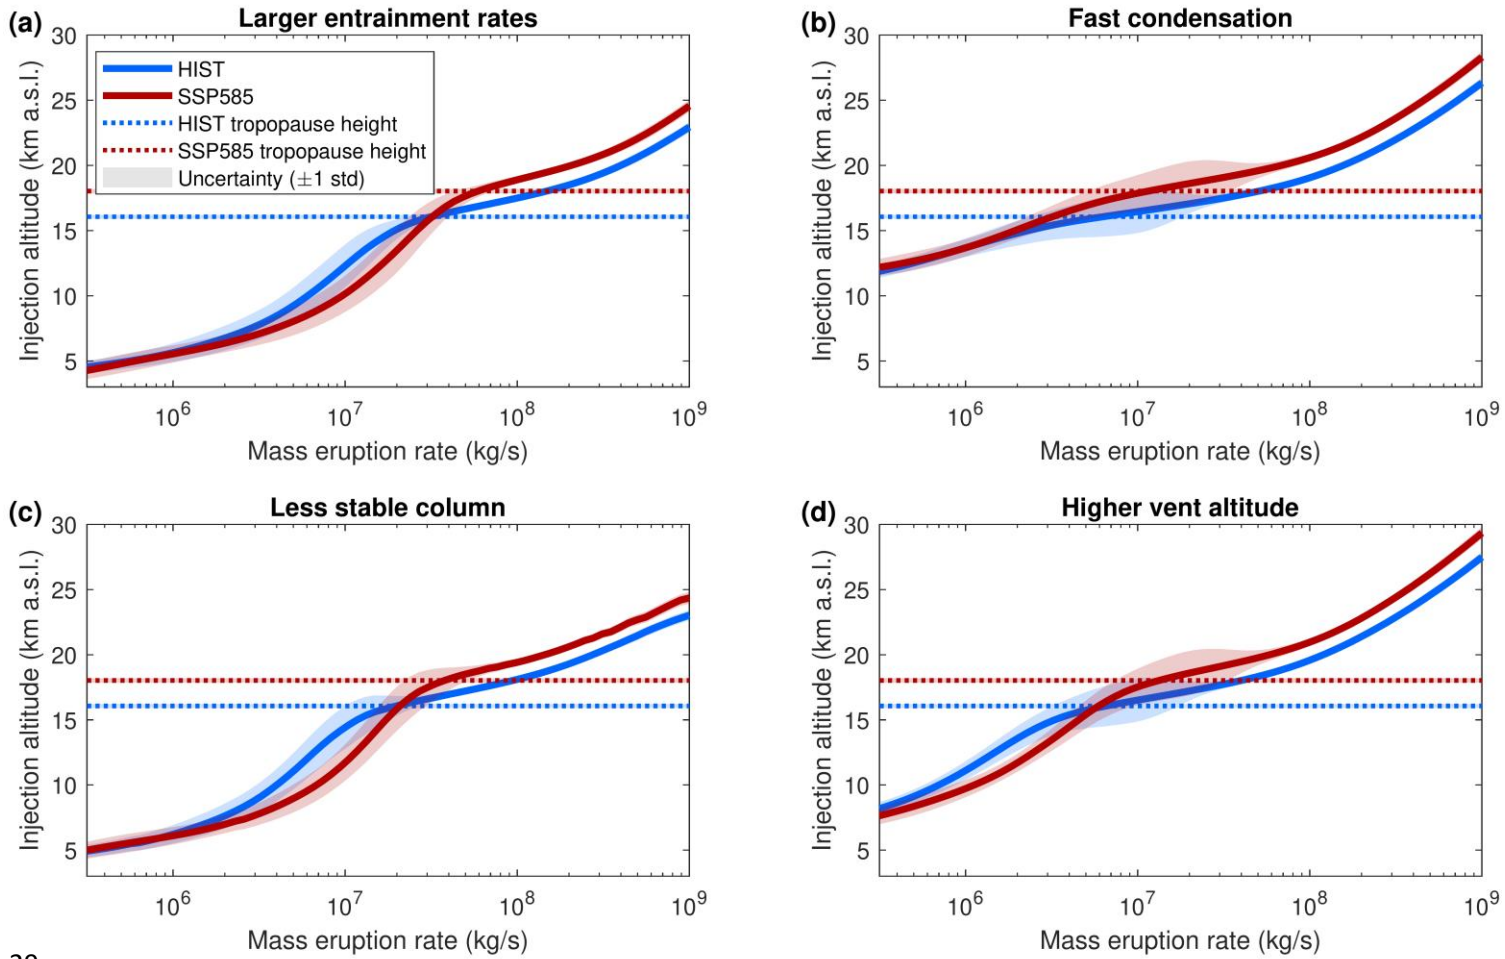

29

30 **Supplementary Figure 3:** Sensitivity of plume modelling results to source and model parameters. Same  
 31 as Supplementary Figure 2, but using different inputs or eruptive column model parameters than those  
 32 used in Supplementary Figure 2 that were applied to infer injection heights in UM-UKCA simulations. In  
 33 panel (a), we used radial and wind entrainment rates of 0.12 and 0.75, instead of 0.1 and 0.25 in  
 34 Supplementary Figure 2. In panel (b), we used a condensation rate of  $10^{-2} \text{ s}^{-1}$  instead of  $10^{-6} \text{ s}^{-1}$  in  
 35 Supplementary Figure 2. In panel (c), we used an injection gas content, temperature and vent radius  
 36 injection velocity ratio of 0.02 wt.%, 800 C and 0.004 instead of 0.05 wt.%, 1100 C and 0.002 in  
 37 Supplementary Figure 2. In panel (d), we used a vent altitude of 3500 m instead of 1500 m in  
 38 Supplementary Figure 2.

39

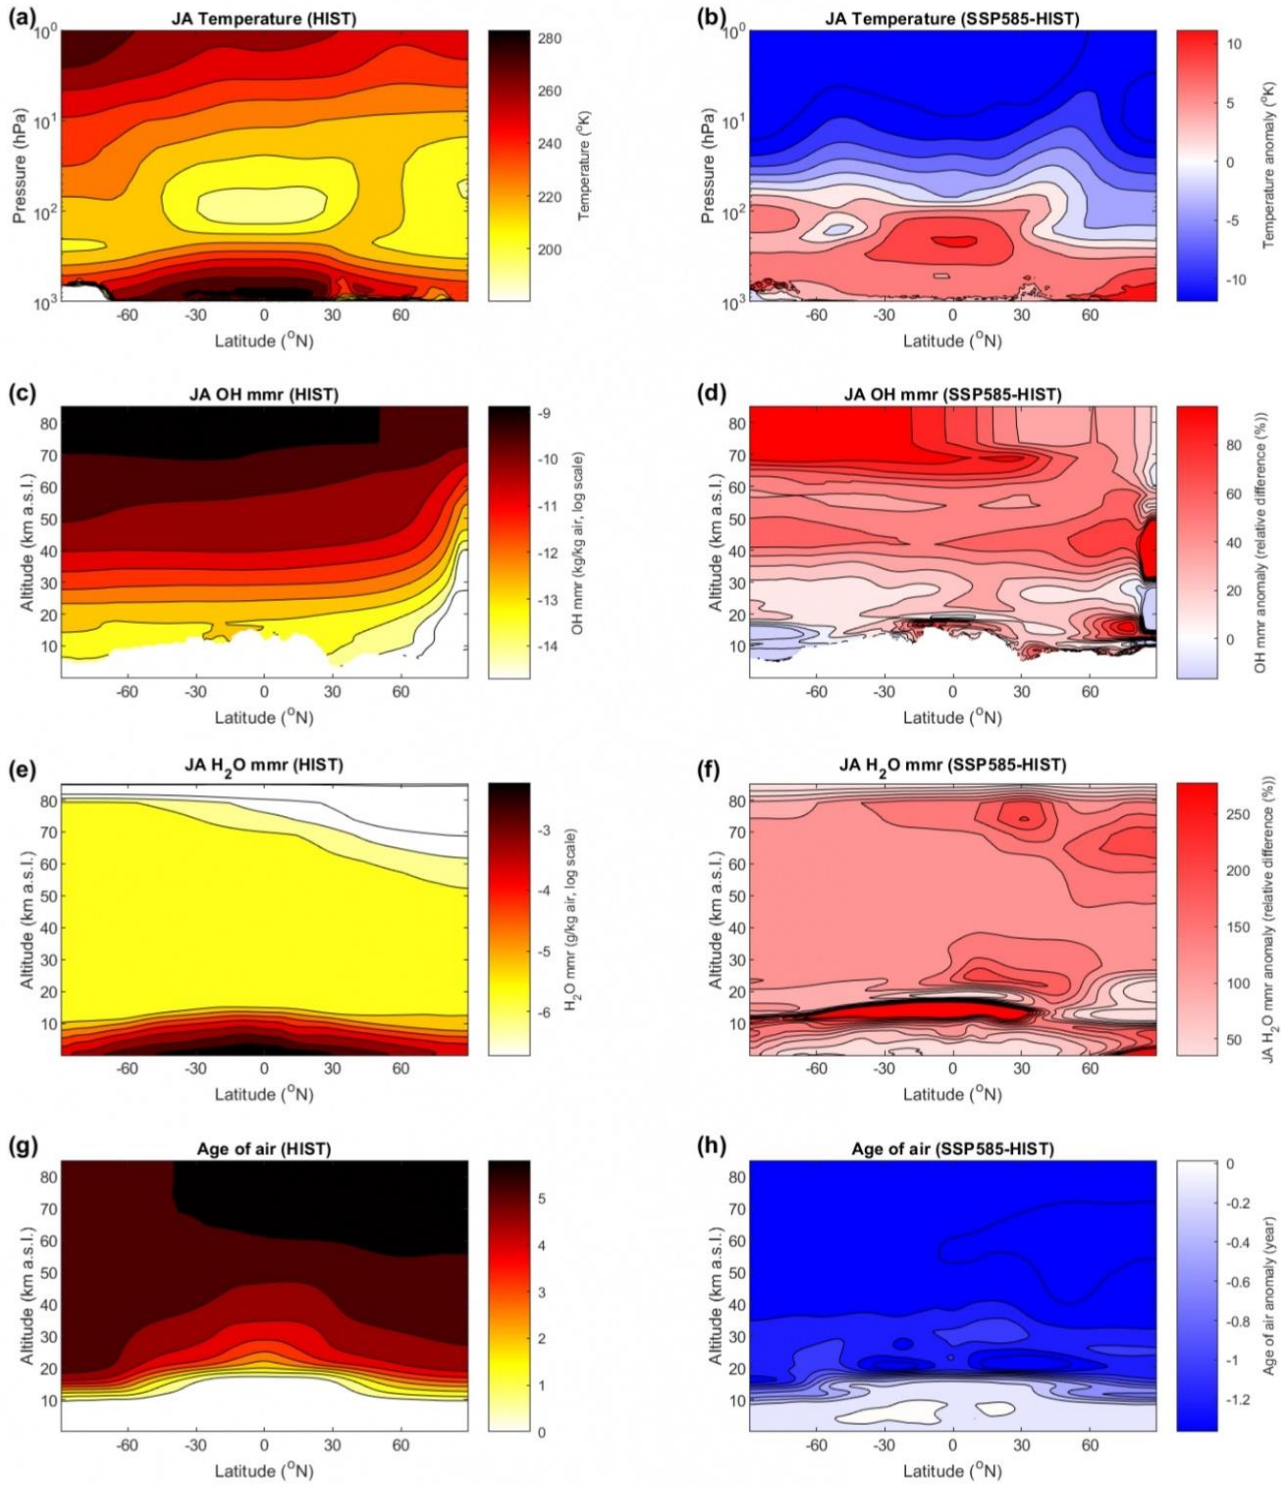

41 **Supplementary Figure 4:** Background state of key climate variables in our control simulations. Zonal  
 42 mean values of July-August (JA) temperature (a,b), JA OH mass mixing ratio (mmr, c,d), JA H<sub>2</sub>O mmr (e,f)

43 and yearly mean age of air (g,h) in our control runs (see Methods). Left panels (a,c,e,g) show values for  
44 HIST, right panels (b,d,f,h) shows the difference between SSP585 and HIST.  
45

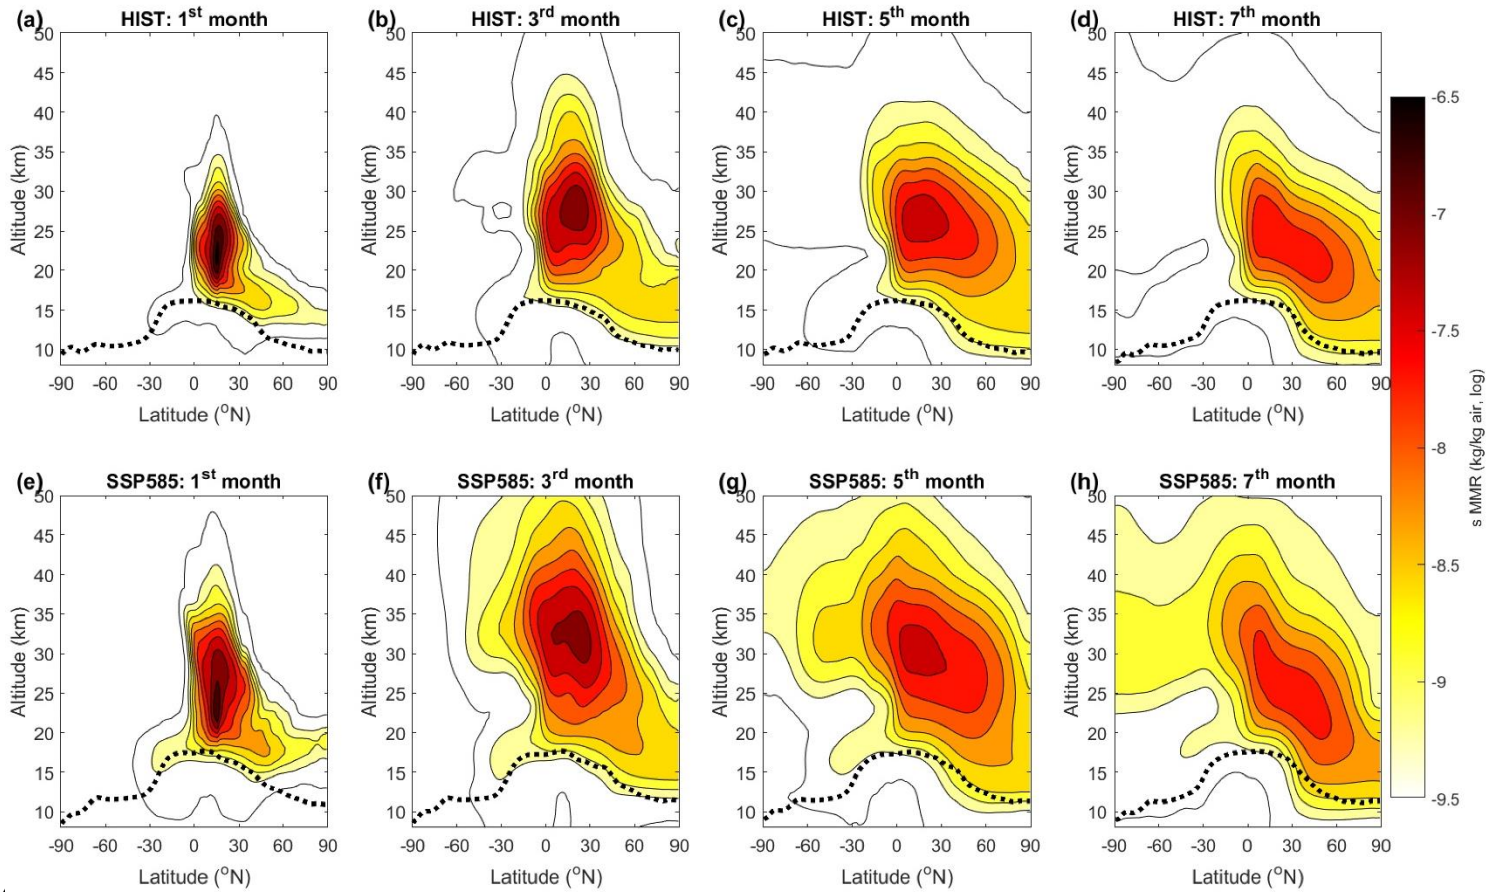

4

47

48 **Supplementary Figure 5:** Initial sulfur distribution for the large-magnitude eruption. Same as Figure 3,

49 but showing S mass mixing ratios on a log scale for the large-magnitude eruption and every two months

50 for the first seven post-eruption months.

51

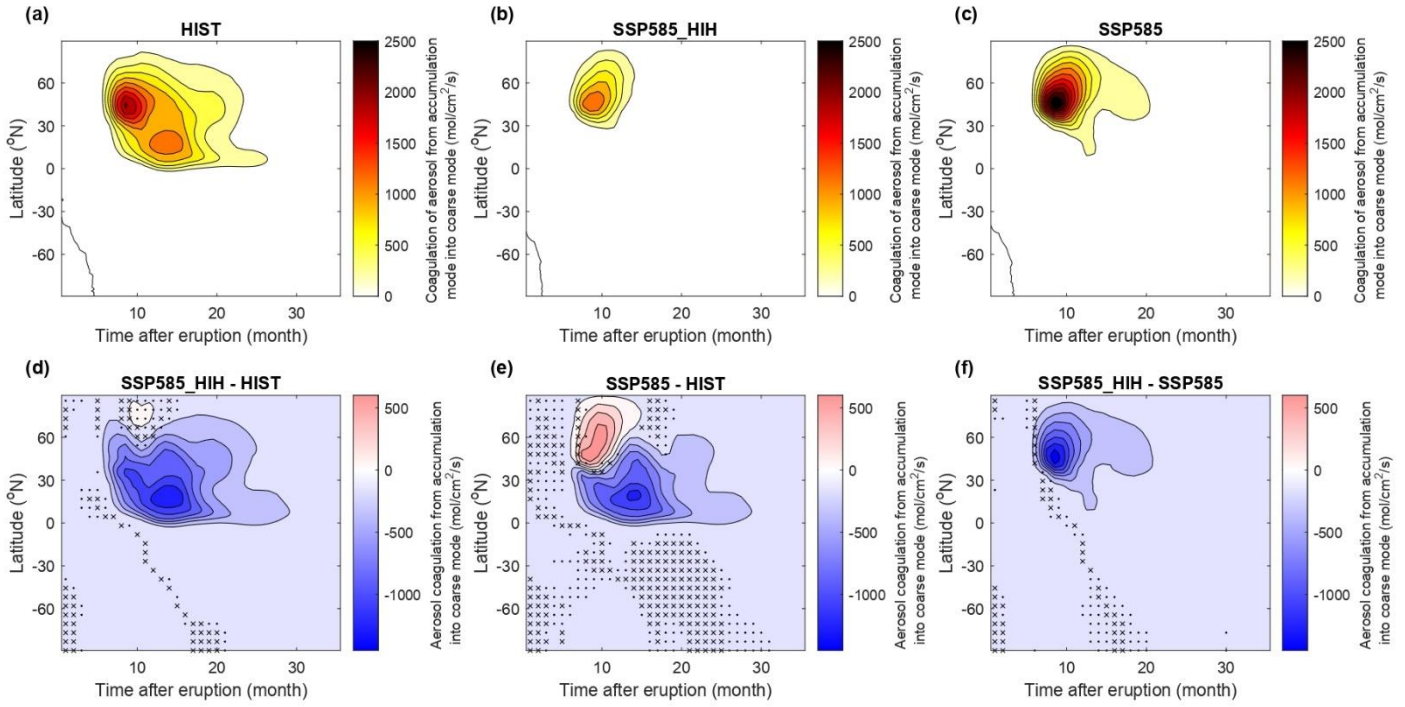

53

54 **Supplementary Figure 6:** Time-latitude evolution of the aerosol coagulation rate ( $\text{mol cm}^{-3} \text{s}^{-1}$ ) for the  
 55 large-magnitude eruption. Same as Figure 6, but showing the rate of coagulation of aerosol particles  
 56 from the accumulation mode to form aerosol particles in the coarse mode.

57



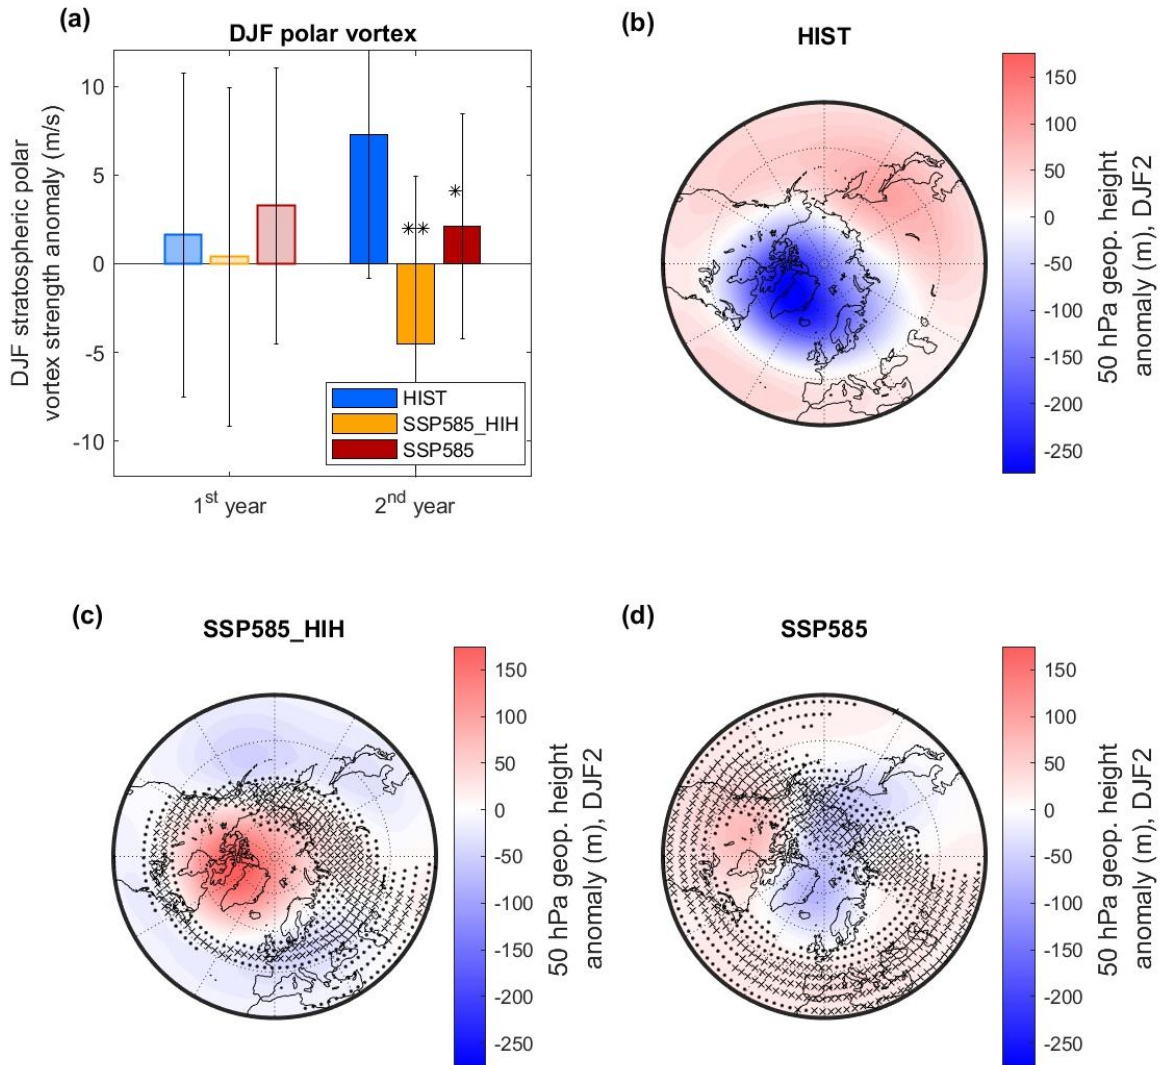

58

59 **Supplementary Figure 7:** Polar vortex response in our simulations for the large-magnitude eruption.

60 Panel (a): Winter (DJF) stratospheric polar vortex strength anomaly for the 1st and 2nd post-eruption

61 years. The polar vortex strength was defined as the zonal mean wind speed averaged over 55-65°N and

62 1-30hPa. Error bars show one standard deviation across the ensemble; a single (respectively double) star

63 indicates that the change relative to the HIST experiment is significant at the 80% (respectively 95%)

64 level.

65 Panels b-d: Geopotential height anomaly at 50hPa over the Northern hemisphere averaged over the first  
66 post-eruption winter (DJF) for the HIST (b), SSP585\_HIH (c) and SSP585 (d) scenarios. Dots highlight  
67 areas where changes are not significant at the 95% and crosses highlight areas where the difference is  
68 not significant at the 80% level.  
69

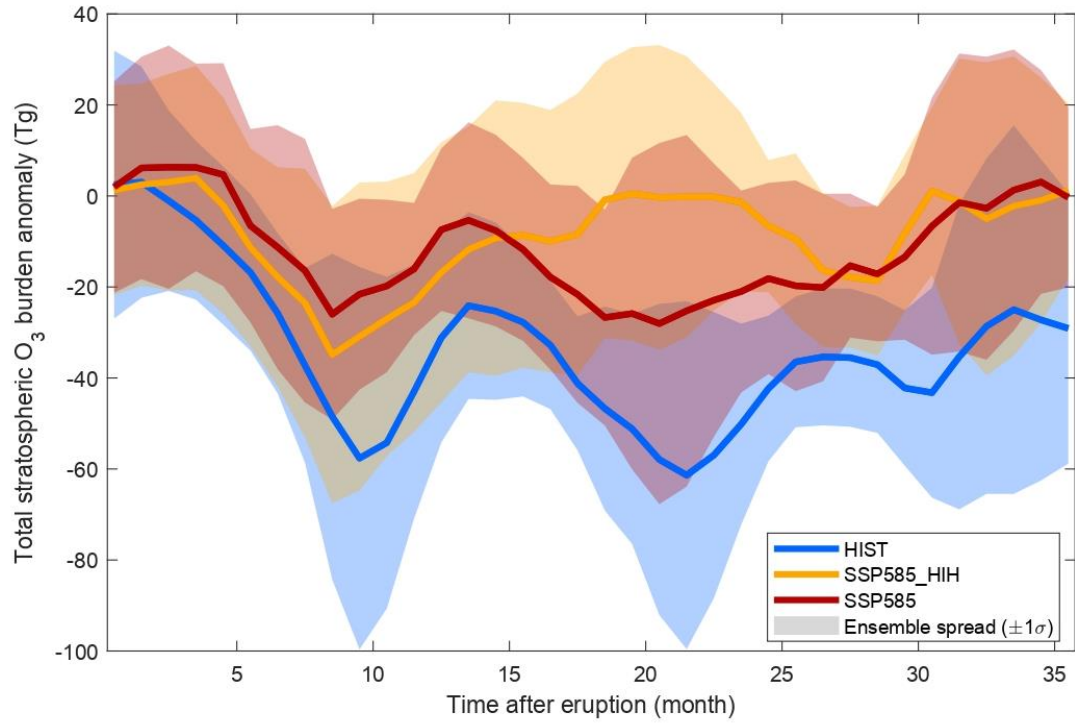

70

71 **Supplementary Figure 8:** Total stratospheric ozone (O<sub>3</sub>) burden anomaly time series in our simulations

72 for the large-magnitude eruption.

73

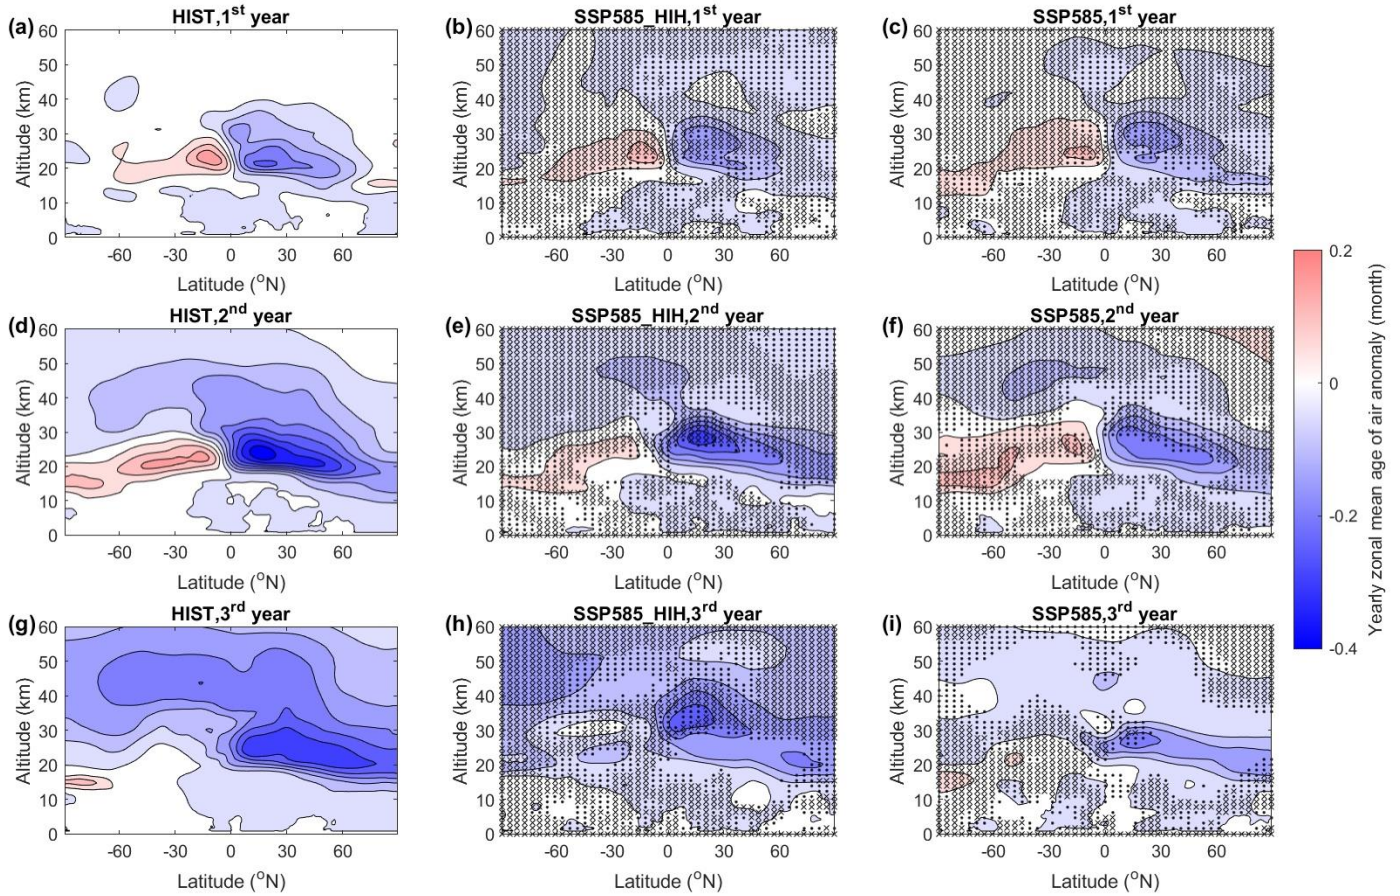

75 **Supplementary Figure 9:** Zonal annual mean age of air anomaly for the 1<sup>st</sup> (a-c), 2<sup>nd</sup> (d-f) and 3<sup>rd</sup> (g-i)  
 76 post-eruption year for the three scenarios considered in this study for the large-magnitude eruption. In  
 77 panels b, c, e, f, h and i, dots highlight areas where changes relative to the HIST scenario are not  
 78 significant at the 95% and crosses highlight areas where the difference is not significant at the 80% level.
